# Supplementary material for: Hydroxyl Radical in/on Illuminated Polar Snow: Formation Rates, Lifetimes, and Steady-State Concentrations
Source: Copernicus journal article supplement (doi:10.5194/acp-2016-123), 2016-03-04
Supplement: Supplementary file 1 [file acp-2016-123-supplement.pdf]

**Table S1.** Summary of regression statistics for the “inverse” plots and sampling conditions for field samples studied with more than one BA concentration.

| Expt # | n* | R <sup>2</sup> | Slope |     | y-intercept              |     | Weather Conditions     |                                   |
|--------|----|----------------|-------|-----|--------------------------|-----|------------------------|-----------------------------------|
|        |    |                | (hr)  | SE  | (hr $\mu\text{M}^{-1}$ ) | SE  | Morning                | Afternoon                         |
| 207    | 2  | -              | 1400  | -   | 1800                     | -   | Cold, foggy            | Sunny, no wind                    |
| 225    | 3  | 0.95           | 320   | 34  | 95                       | 6.1 | Slight overcast        | Very sunny, no wind               |
| 254    | 3  | 0.99           | 370   | 31  | 60                       | 6.7 | Slight overcast        | Warm, no wind                     |
| 263    | 4  | 0.77           | 640   | 250 | 180                      | 71  | Bit overcast,<br>windy | Very overcast, fog,<br>light snow |

\* Number of data points in inverse plot regression.

**Table S2.** Results for samples studied in the laboratory to determine  $P_{OH}$  in quartz tubes with silicon caps.

| Sample | Name    | [HOOH]<br>( $\mu\text{M}$ ) | Temp<br>(K) | $P_{p\text{-HBA}}$         |          | $P_{OH}$                  |          |
|--------|---------|-----------------------------|-------------|----------------------------|----------|---------------------------|----------|
|        |         |                             |             | ( $\mu\text{M min}^{-1}$ ) | SE       | ( $\mu\text{M hr}^{-1}$ ) | SE       |
| Summit | 0526    | 9.26                        | 274         | 3.61E-04                   | 5.08E-05 | 1.14E-01                  | 1.60E-02 |
|        | 0526    | 9.26                        | 274         | 2.85E-04                   | 3.88E-05 | 9.00E-02                  | 1.22E-02 |
|        | 0762    | 14.5                        | 274         | 5.32E-04                   | 7.95E-05 | 1.68E-01                  | 2.51E-02 |
|        | 0762    | 14.5                        | 274         | 5.89E-04                   | 8.65E-05 | 1.86E-01                  | 2.73E-02 |
|        | 0763    | 12.1                        | 274         | 4.56E-04                   | 6.84E-05 | 1.44E-01                  | 2.16E-02 |
| Dome C | 0608    |                             | 274         | 2.09E-04                   | 3.12E-05 | 6.60E-02                  | 9.85E-03 |
| Blanks | Summit  |                             | 274         | 7.06E-05                   | 9.13E-06 | 2.23E-02                  | 2.88E-03 |
|        | Dome C  |                             | 274         | 6.20E-05                   | 7.21E-06 | 1.96E-02                  | 2.28E-03 |
|        | Milli-Q |                             | 274         | 5.24E-05                   | 6.94E-06 | 1.65E-02                  | 2.19E-03 |
| Summit | 0526    | 9.26                        | 263         | 1.21E-04                   | 2.28E-05 | 8.96E-02                  | 1.69E-02 |
|        | 0762    | 14.5                        | 263         | 1.60E-04                   | 1.13E-05 | 1.18E-01                  | 8.38E-03 |
|        | 0763    | 14.5                        | 263         | 1.31E-04                   | 1.90E-05 | 9.71E-02                  | 1.41E-02 |
| Dome C | 0608    |                             | 263         | 9.12E-05                   | 1.35E-05 | 6.76E-02                  | 1.00E-02 |
| Blanks | Summit  |                             | 263         | 4.18E-05                   | 6.16E-06 | 3.10E-02                  | 4.56E-03 |
|        | Dome C  |                             | 263         | 3.98E-05                   | 5.53E-06 | 2.95E-02                  | 4.10E-03 |
|        | Milli-Q |                             | 263         | 2.61E-05                   | 4.12E-06 | 1.93E-02                  | 3.05E-03 |

**Table S3.** Data from inverse plots for samples studied in the laboratory in quartz tubes with silicon caps.

| Sample | Name    | Temp<br>(K) | y-int                    |      | slope |     | $P_{OH}$                  |      | $k'_{OH} \times 10^{-4}$ |      | $\tau_{OH}$       |     |
|--------|---------|-------------|--------------------------|------|-------|-----|---------------------------|------|--------------------------|------|-------------------|-----|
|        |         |             | (hr $\mu\text{M}^{-1}$ ) | SE   | (hr)  | SE  | ( $\mu\text{M hr}^{-1}$ ) | SE   | ( $\text{s}^{-1}$ )      | SE   | ( $\mu\text{s}$ ) | SE  |
| Summit | 0526    | 293         | 8.2                      | 0.55 | 110   | 6.2 | 0.64                      | 0.05 | 8.3                      | 0.72 | 12                | 1.1 |
|        |         | 274         | 11                       | 0.9  | 120   | 27  | 0.48                      | 0.05 | 5.2                      | 1.2  | 19                | 4.4 |
|        |         | 263         | 9.5                      | 0.5  | 160   | 17  | 1.3                       | 0.10 | 6.6                      | 0.75 | 15                | 1.7 |
|        | 0762    | 274         | 10.                      | 0.9  | 120   | 11  | 1.2                       | 0.12 | 7.3                      | 0.90 | 14                | 12  |
|        |         | 263         | 13                       | 1.1  | 120   | 15  | 0.96                      | 0.10 | 3.7                      | 0.54 | 27                | 12  |
|        | 0763    | 274         | 9.7                      | 0.7  | 100   | 8.7 | 1.3                       | 0.12 | 6.5                      | 0.73 | 16                | 1.8 |
| Dome C | 0608    | 263         | 15                       | 0.8  | 130   | 100 | 0.84                      | 0.06 | 3.5                      | 0.32 | 29                | 2.7 |
|        |         | 293         | 8.2                      | 0.20 | 110   | 26  | 0.64                      | 0.04 | 8.3                      | 1.9  | 12                | 8.7 |
|        |         | 274         | 12                       | 0.6  | 100   | 19  | 0.44                      | 0.03 | 4.0                      | 0.76 | 25                | 4.8 |
| Blanks | Summit  | 263         | 11                       | 1.0  | 100   | 32  | 1.1                       | 0.12 | 4.1                      | 1.3  | 24                | 7.8 |
|        |         | 274         | 13                       | 0.6  | 66    | 17  | 0.39                      | 0.03 | 2.2                      | 0.57 | 45                | 12  |
|        |         | 263         | 26                       | 0.8  | 220   | 36  | 0.48                      | 0.03 | 3.3                      | 0.54 | 30.               | 4.9 |
|        | Dome C  | 274         | 15                       | 0.4  | 53    | 11  | 0.35                      | 0.02 | 1.6                      | 0.34 | 62                | 13  |
|        |         | 263         | 9.6                      | 0.4  | 60    | 12  | 1.3                       | 0.08 | 2.4                      | 0.48 | 42                | 8.6 |
|        | Milli-Q | 293         | 14                       | 1.4  | 20    | 1.2 | 0.37                      | 0.04 | 0.83                     | 0.01 | 120               | 14  |
|        |         | 274         | 6.0                      | 0.8  | 34    | 9.8 | 0.88                      | 0.13 | 2.6                      | 0.83 | 39                | 12  |
|        |         | 263         | 11                       | 0.9  | 82    | 4.5 | 0.50                      | 0.05 | 3.0                      | 0.30 | 34                | 3.4 |

**Table S4.** Summary of measured [ $\cdot\text{OH}$ ] and estimated [DOC] for samples studied in the laboratory.

| Sample | Name | Temp<br>(K) | [ $\cdot\text{OH}$ ] |      | [DOC]                        |    |
|--------|------|-------------|----------------------|------|------------------------------|----|
|        |      |             | ( $10^{-15}$ M)      | SE   | ( $\mu\text{mol-C L}^{-1}$ ) | SE |
| Summit | 0526 | 274         | 0.60                 | 0.17 | 140                          | 75 |
|        |      | 263         | 0.98                 | 0.19 | 170                          | 89 |
|        | 0762 | 274         | 0.66                 | 0.13 | 190                          | 98 |
|        |      | 263         | 0.35                 | 0.09 | 97                           | 51 |
|        | 0763 | 274         | 0.47                 | 0.10 | 170                          | 87 |
|        |      | 263         | 0.92                 | 0.16 | 91                           | 46 |
| Dome C | 0608 | 274         | 0.76                 | 0.13 | 110                          | 56 |
|        |      | 263         | 0.46                 | 0.18 | 110                          | 65 |

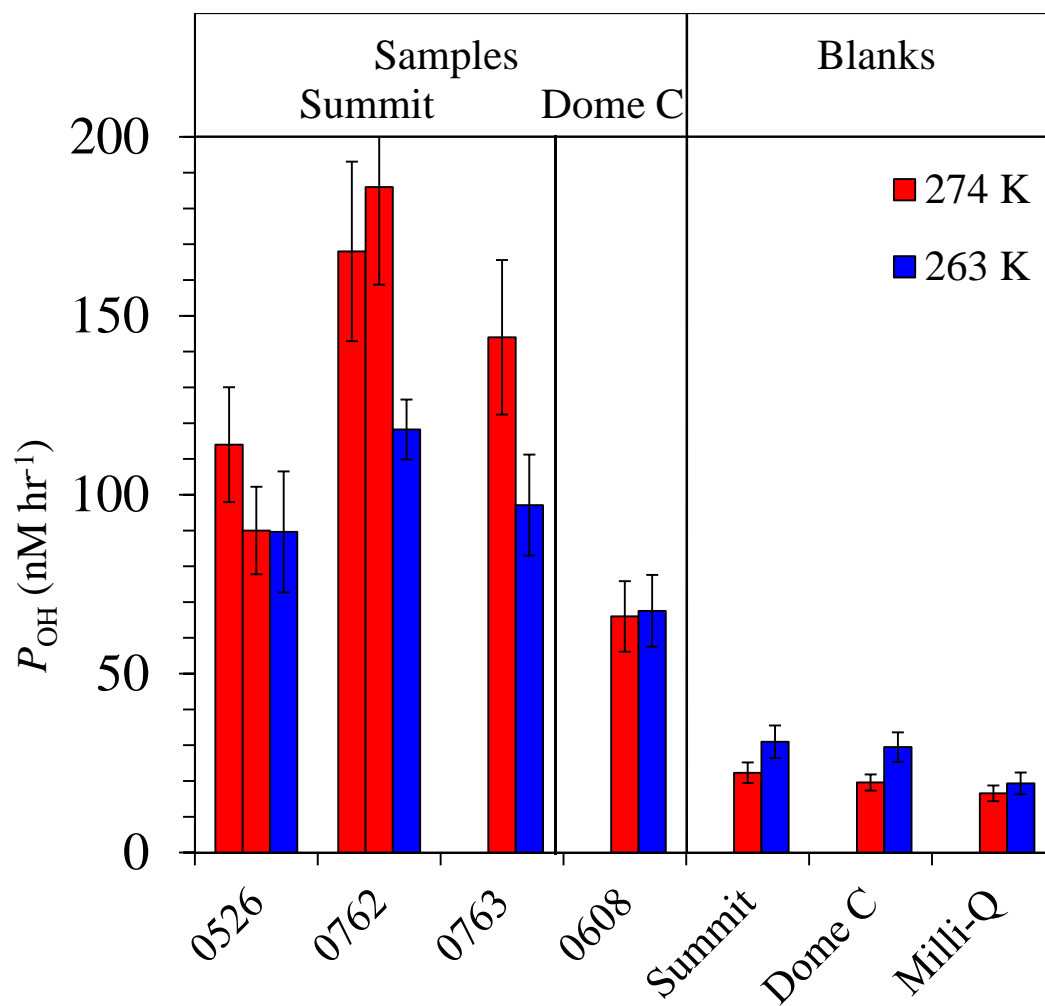

**Fig. S1.** Experimentally measured rate of  $\cdot\text{OH}$  formation in Summit and Dome C snow samples ( $P_{\text{OH,exp}}$ ) in samples studied as solution (274 K, red) and as ice (263 K, blue). Error bars represent  $\pm 1$  standard error, based on propagated errors in the rate of  $p$ -HBA formation ( $P_{p\text{-HBA}}$ ) and  $Y_{p\text{-HBA}}$ . Sample values are not adjusted for  $\cdot\text{OH}$  formation in the blanks.

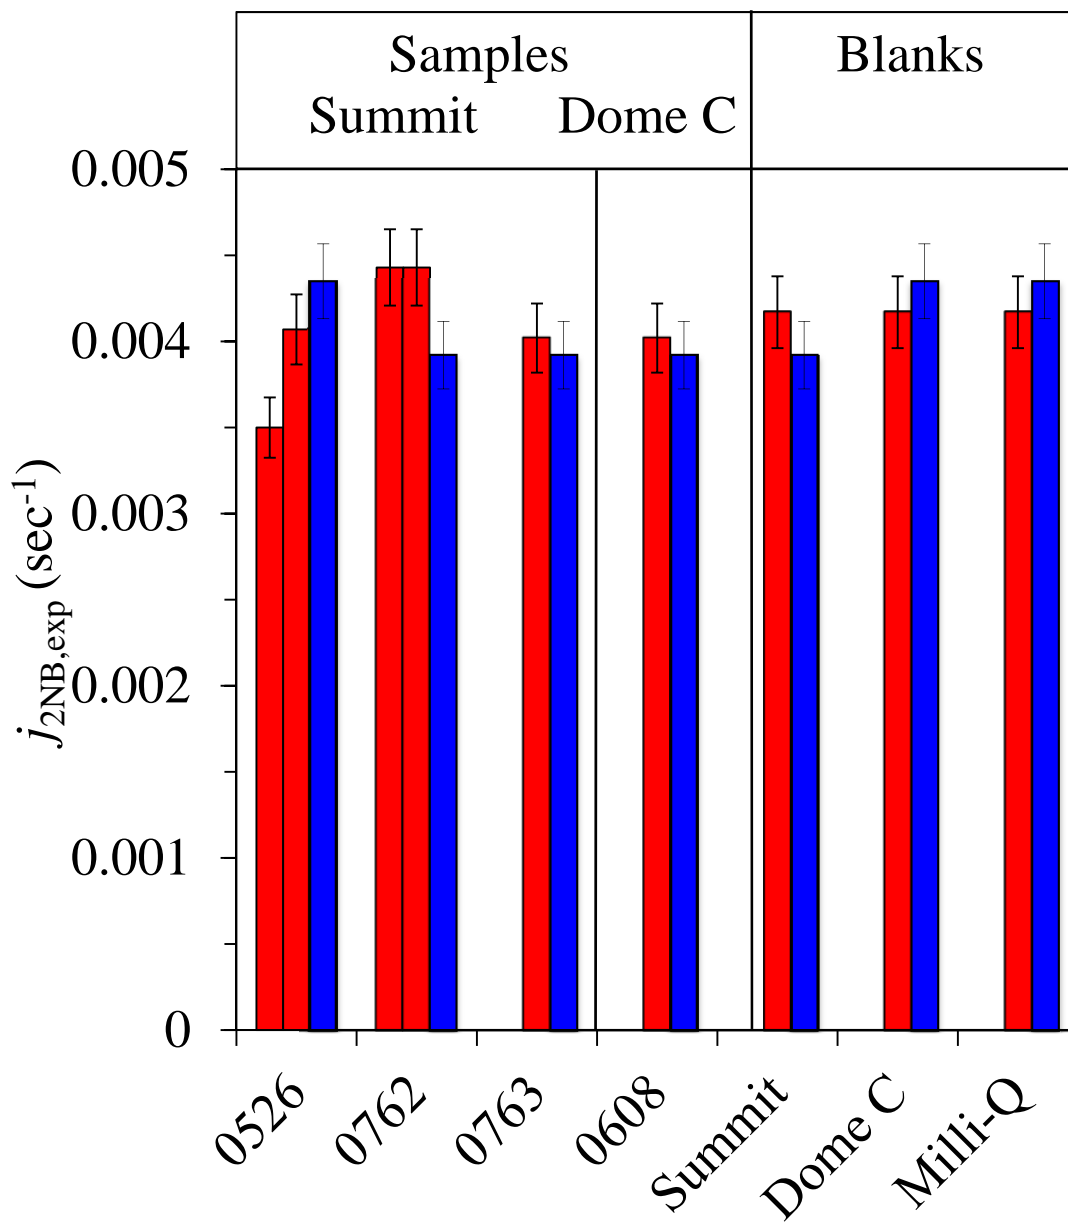

**Fig. S2.** Direct photodegradation of measured 2-nitrobenzaldehyde ( $j_{2NB}$ ) corresponding to each experiment in Figure S1. Red bars are  $j_{2NB}$  at 274 K and blue bars are  $j_{2NB}$  at 263 K. Error bars represent  $\pm 5\%$  error.
